# Supplementary material
Source: PubMed Central journal article supplement (PMC8712346)
Supplement: NIHMS1722992-supplement-tS1.pdf [file NIHMS1722992-supplement-tS1.pdf]

**Supplementary Table 1.** Characteristics of disease flares requiring treatment of 1377 patients with RMD from D1 to 1-month post D-2 following two-dose SARS-CoV-2 mRNA vaccination

|                                                                                 |            |
|---------------------------------------------------------------------------------|------------|
| N                                                                               | 1377       |
| <b>Flare since D1, no. (%)</b>                                                  | 151 (11)   |
| Flare between doses                                                             | 61 (4)     |
| Days from D1 and flare, median (IQR)                                            | 5 (2, 12)  |
| Flare after D2                                                                  | 90 (7)     |
| Days from D2 and flare, median (IQR)                                            | 11 (3, 20) |
| <b>Length of flare symptoms (days), median (IQR)</b>                            | 10 (6, 22) |
| <b>Flare treatment, no. (%)<sup>1</sup></b>                                     |            |
| NSAID                                                                           | 50 (4)     |
| Topical corticosteroid                                                          | 12 (1)     |
| Oral corticosteroid                                                             | 114 (8)    |
| Length of treatment in days, median (IQR)                                       | 7 (6, 12)  |
| Intramuscular corticosteroid                                                    | 4 (0.3)    |
| Intravenous corticosteroid                                                      | 0(0)       |
| Immunomodulatory <sup>2</sup>                                                   | 0 (0)      |
| <b>Hospitalized, no. (%)</b>                                                    | 0(0)       |
| <b>ICU stay, no. (%)</b>                                                        | 0 (0)      |
| <b>Baseline immunosuppression changed because of flare, no. (%)<sup>1</sup></b> | 35 (3)     |
| Therapy added <sup>1</sup>                                                      | 21 (2)     |
| Conventional DMARD <sup>3</sup>                                                 | 10 (1)     |
| Biologic <sup>4</sup>                                                           | 6 (0.4)    |
| Corticosteroid <sup>5</sup>                                                     | 7 (1)      |
| Immunomodulatory <sup>2</sup>                                                   | 0 (0)      |
| Dose increased <sup>1</sup>                                                     | 23 (2)     |
| Conventional DMARD <sup>6</sup>                                                 | 8 (1)      |
| Biologic <sup>7</sup>                                                           | 3 (0.2)    |
| Corticosteroid <sup>5</sup>                                                     | 12 (1)     |
| Immunomodulatory <sup>2</sup>                                                   | 0 (0)      |

<sup>1</sup> Participants could select multiple options for these questions so the sum is greater than the N

<sup>2</sup> Intravenous immunoglobulin (IVIg) or subcutaneous immunoglobulin (SCIg)

<sup>3</sup> Hydroxychloroquine, leflunomide, and methotrexate

<sup>4</sup> Adalimumab, etanercept, rituximab, upadacitinib, secukinumab

<sup>5</sup> Prednisone and prednisone equivalents

<sup>6</sup> Hydroxychloroquine, leflunomide, and methotrexate

<sup>7</sup> Adalimumab, etanercept, secukinumab
