# Supplementary material
Source: PubMed Central journal article supplement (PMC8712346)
Supplement: NIHMS1722992-supplement-tS2.pdf [file NIHMS1722992-supplement-tS2.pdf]

|                                      |          |          |          |          |          |          |           |
|--------------------------------------|----------|----------|----------|----------|----------|----------|-----------|
| Baseline immunosuppression changed   |          |          |          |          |          |          |           |
| Therapy added                        |          |          |          |          |          |          |           |
| Biologic                             | 1 (1%)   | 1 (3%)   | 0 (0)    | 0 (0)    | 0 (0)    | 0 (0)    | 1 (4%)    |
| Conventional DMARD                   | 4 (5%)   | 1 (3%)   | 1 (14%)  | 0 (0)    | 0 (0)    | 0 (0)    | 2 (8%)    |
| Immunomodulatory                     | 0 (0)    | 0 (0)    | 0 (0)    | 0 (0)    | 0 (0)    | 0 (0)    | 0 (0)     |
| Glucocorticoid                       | 1 (1%)   | 2 (7%)   | 0 (0)    | 0 (0)    | 0 (0)    | 0 (0)    | 1 (4%)    |
| Therapy increased                    |          |          |          |          |          |          |           |
| Biologic                             | 3 (4%)   | 0 (0)    | 0 (0)    | 0 (0)    | 0 (0)    | 0 (0)    | 0 (0)     |
| Non-biologic DMARD                   | 1 (1%)   | 1 (3%)   | 0 (0)    | 0 (0)    | 0 (0)    | 0 (0)    | 3 (12%)   |
| Immunomodulatory                     | 0 (0)    | 0 (0)    | 0 (0)    | 0 (0)    | 0 (0)    | 0 (0)    | 0 (0)     |
| Glucocorticoid                       | 1 (1%)   | 6 (20%)  | 0 (0)    | 1 (3%)   | 1 (14%)  | 0 (0)    | 1 (4%)    |
| Flare symptoms                       |          |          |          |          |          |          |           |
| Worsening symptom                    | 69 (95%) | 28 (93%) | 7 (100%) | 4 (67%)  | 6 (86%)  | 1 (50%)  | 26 (100%) |
| Worsening joint pain                 | 59 (81%) | 20 (67%) | 5 (71%)  | 2 (33%)  | 1 (14%)  | 1 (50%)  | 21 (81%)  |
| Worsening joint stiffness            | 45 (62%) | 14 (47%) | 5 (71%)  | 1 (17%)  | 1 (14%)  | 1 (50%)  | 12 (46%)  |
| Worsening fatigue                    | 31 (42%) | 18 (60%) | 4 (57%)  | 3 (50%)  | 4 (57%)  | 1 (50%)  | 14 (54%)  |
| Worsening joint swelling             | 42 (58%) | 12 (40%) | 3 (43%)  | 0 (0)    | 1 (14%)  | 0 (0)    | 12 (46%)  |
| Worsening muscle pain                | 24 (33%) | 15 (50%) | 6 (86%)  | 3 (50%)  | 1 (14%)  | 0 (0)    | 12 (46%)  |
| Worsening keratoconjunctivitis sicca | 10 (14%) | 11 (37%) | 5 (71%)  | 2 (33%)  | 0 (0)    | 0 (0)    | 9 (35%)   |
| Worsening muscle weakness            | 11 (15%) | 5 (17%)  | 2 (29%)  | 3 (50%)  | 0 (0)    | 1 (50%)  | 10 (38%)  |
| Worsening GI symptoms                | 10 (14%) | 5 (17%)  | 2 (29%)  | 2 (33%)  | 1 (14%)  | 0 (0)    | 9 (35%)   |
| Worsening xerostomia                 | 6 (8%)   | 7 (23%)  | 5 (71%)  | 1 (17%)  | 0 (0)    | 1 (50%)  | 8 (31%)   |
| Worsening rash                       | 6 (8%)   | 5 (17%)  | 1 (14%)  | 3 (50%)  | 1 (14%)  | 0 (0)    | 7 (27%)   |
| Worsening Raynaud's syndrome         | 3 (4%)   | 7 (23%)  | 0 (0)    | 2 (33%)  | 0 (0)    | 1 (50%)  | 8 (31%)   |
| Worsening shortness of breath        | 2 (3%)   | 3 (10%)  | 1 (14%)  | 2 (33%)  | 1 (14%)  | 0 (0)    | 9 (35%)   |
| Worsening chest pain                 | 2 (3%)   | 3 (10%)  | 0 (0)    | 1 (17%)  | 2 (29%)  | 0 (0)    | 5 (19%)   |
| Worsening oral ulcer(s)              | 2 (3%)   | 5 (17%)  | 0 (0)    | 0 (0)    | 1 (14%)  | 0 (0)    | 3 (12%)   |
| Worsening skin tightening            | 1 (1%)   | 3 (10%)  | 0 (0)    | 2 (33%)  | 1 (14%)  | 1 (50%)  | 0 (0)     |
| Worsening nasal ulcer(s)             | 1 (1%)   | 3 (10%)  | 0 (0)    | 0 (0)    | 0 (0)    | 0 (0)    | 2 (8%)    |
| Worsening alopecia                   | 1 (1%)   | 1 (3%)   | 2 (29%)  | 1 (17%)  | 0 (0)    | 0 (0)    | 1 (4%)    |
| Worsening kidney function            | 0 (0)    | 1 (3%)   | 0 (0)    | 0 (0)    | 0 (0)    | 0 (0)    | 2 (8%)    |
| Worsening proteinuria                | 0 (0)    | 1 (3%)   | 0 (0)    | 0 (0)    | 0 (0)    | 0 (0)    | 1 (4%)    |
| New symptom                          | 47 (64%) | 23 (77%) | 4 (57%)  | 6 (100%) | 7 (100%) | 2 (100%) | 20 (77%)  |
| New joint pain                       | 22 (30%) | 7 (23%)  | 2 (29%)  | 1 (17%)  | 2 (29%)  | 0 (0)    | 5 (19%)   |
| New joint swelling                   | 22 (30%) | 4 (13%)  | 2 (29%)  | 1 (17%)  | 1 (14%)  | 1 (50%)  | 4 (15%)   |
| New muscle pain                      | 17 (23%) | 8 (27%)  | 2 (29%)  | 0 (0)    | 1 (14%)  | 0 (0)    | 7 (27%)   |

|                                |          |         |         |         |         |         |         |
|--------------------------------|----------|---------|---------|---------|---------|---------|---------|
| New joint stiffness            | 19 (26%) | 4 (13%) | 1 (14%) | 1 (17%) | 1 (14%) | 0 (0)   | 5 (19%) |
| New muscle weakness            | 11 (15%) | 2 (7%)  | 1 (14%) | 0 (0)   | 0 (0)   | 1 (50%) | 3 (12%) |
| New oral ulcer(s)              | 6 (8%)   | 4 (13%) | 1 (14%) | 0 (0)   | 1 (14%) | 1 (50%) | 4 (15%) |
| New fever                      | 7 (10%)  | 1 (3%)  | 0 (0)   | 1 (17%) | 1 (14%) | 0 (0)   | 3 (12%) |
| New urticaria                  | 4 (5%)   | 0 (0)   | 0 (0)   | 0 (0)   | 1 (14%) | 0 (0)   | 2 (8%)  |
| New xerostomia                 | 0 (0)    | 6 (20%) | 0 (0)   | 0 (0)   | 0 (0)   | 0 (0)   | 1 (4%)  |
| New nasal ulcer(s)             | 0 (0)    | 4 (13%) | 0 (0)   | 0 (0)   | 1 (14%) | 0 (0)   | 3 (12%) |
| New other rash                 | 3 (4%)   | 1 (3%)  | 0 (0)   | 3 (50%) | 0 (0)   | 0 (0)   | 1 (4%)  |
| New malar rash                 | 2 (3%)   | 2 (7%)  | 0 (0)   | 0 (0)   | 0 (0)   | 0 (0)   | 4 (15%) |
| New Gottron's papules          | 0 (0)    | 3 (10%) | 0 (0)   | 0 (0)   | 1 (14%) | 0 (0)   | 3 (12%) |
| New skin tightening            | 3 (4%)   | 0 (0)   | 0 (0)   | 0 (0)   | 0 (0)   | 0 (0)   | 3 (12%) |
| New keratoconjunctivitis sicca | 2 (3%)   | 0 (0)   | 0 (0)   | 1 (17%) | 0 (0)   | 1 (50%) | 2 (8%)  |
| New shortness of breath        | 4 (5%)   | 0 (0)   | 0 (0)   | 0 (0)   | 2 (29%) | 0 (0)   | 1 (4%)  |
| New chest pain                 | 0 (0)    | 2 (7%)  | 0 (0)   | 0 (0)   | 1 (14%) | 1 (50%) | 1 (4%)  |
| New V-sign rash                | 1 (1%)   | 1 (3%)  | 0 (0)   | 0 (0)   | 0 (0)   | 0 (0)   | 2 (8%)  |
| New heliotrope rash            | 1 (1%)   | 0 (0)   | 0 (0)   | 1 (17%) | 0 (0)   | 1 (50%) | 2 (8%)  |
| New discoid rash               | 0 (0)    | 2 (7%)  | 0 (0)   | 0 (0)   | 0 (0)   | 0 (0)   | 1 (4%)  |
| New proteinuria                | 1 (1%)   | 2 (7%)  | 0 (0)   | 0 (0)   | 0 (0)   | 0 (0)   | 0 (0)   |
| New Raynaud's syndrome         | 0 (0)    | 1 (3%)  | 1 (14%) | 0 (0)   | 0 (0)   | 0 (0)   | 1 (4%)  |
| New shawl rash                 | 1 (1%)   | 1 (3%)  | 0 (0)   | 1 (17%) | 0 (0)   | 0 (0)   | 0 (0)   |
| New alopecia                   | 1 (1%)   | 1 (3%)  | 0 (0)   | 0 (0)   | 0 (0)   | 0 (0)   | 0 (0)   |
